# Supplementary material
Source: Springer Nature journal article supplement (https://www.springermedizin.de/resource/supplementary/13054_2010_9332_MOESM5_ESM.pdf/9705946)
Supplement: MOESM5 [file 9705946]

|                                                                                     | <i>AIS head&lt;3</i> |                     |        | <i>AIS head≥3</i> |                     |        |
|-------------------------------------------------------------------------------------|----------------------|---------------------|--------|-------------------|---------------------|--------|
|                                                                                     | FFP:pRBC<br>≤1:2     | FFP:pRBC<br>>1:2    | p      | FFP:pRBC<br>≤1:2  | FFP:pRBC<br>>1:2    | p      |
| Fluids prehospital                                                                  |                      |                     |        |                   |                     |        |
| Crystalloids (ml, mean ±SD)                                                         | 1491±937             | 1391±819            | 0.433  | 1354±888          | 1297±743            | 0.981  |
| Colloids (ml, mean ±SD)                                                             | 991±615              | 939±579             | 0.272  | 982±654           | 945±475             | 0.957  |
| Fluids emergency room                                                               |                      |                     |        |                   |                     |        |
| Crystalloids (ml, mean ±SD)                                                         | 3549±2858            | 3981±2959           | 0.071  | 3122±2640         | 4000±3036           | <0.001 |
| Colloids (ml, mean ±SD)                                                             | 1648±1478            | 1802±1592           | 0.080  | 1568±1247         | 1788±1371           | 0.112  |
| pRBC transfusion (n, mean±SD)                                                       | 19.5±11.2            | 19.5±11.9           | 0.916  | 18.4±9.8          | 18.9±10.7           | 0.980  |
| FFP transfusion (n, mean±SD, min./ max.)                                            | 5.7±5.2<br>(0-32)    | 18.0±12.3<br>(6-88) | <0.001 | 5.5±4.8<br>(0-30) | 17.8±10.4<br>(6-84) | <0.001 |
| Minutes ER (min., mean ±SD)                                                         | 59 (±39)             | 64 (±40)            | 0.115  | 66 (±44)          | 69 (±44)            | 0.464  |
| Minutes from admission incl. ER, operation theatre to ICU transfer (min., mean ±SD) | 303 (±144)           | 350 (±140)          | <0.001 | 290 (±147)        | 337 (±143)          | 0.001  |
